# Supplementary material for: Effect of Blue LED Phototherapy on Oxidative Stress and DNA Damage in Term and Preterm Infants with Hyperbilirubinemia
Source: Research Square preprint supplement (doi:10.21203/rs.3.rs-8767914/v1), 2026-02-16
Supplement: Supplementary file 1 [file 28190f2b3a243cb2fe89d16b.docx]

|  |  | **All patients**  **(n=76)** | **Term Study**  **(n=20)** | **Term Control**  **(n=17)** | **p*** | **Preterm Study**  **(n=20)** | **Preterm Control**  **(n=19)** | **p**** |
| --- | --- | --- | --- | --- | --- | --- | --- | --- |
| **Demographic characteristics** |  |  |  |  |  |  |  |  |
| Gender, n (%) | Male | 41 (%53.9) | 12 (%60) | 8 (%47) | 0.431 | 10 (%50) | 11 (%57) | 0.621 |
| Gestational age (week), Mean (SD) |  | 36.3 (2.1) | 38.0 (0.8) | 38.2 (0.9) | 0.318 | 34.1(1.4) | 35.1(1.1) | 0.036 |
| Birth weight (gr), Mean (SD) |  | 2779 (636) | 3228 (521) | 3160 (372) | 0.532 | 2455 (554) | 2279 (461) | 0.357 |
| Birth lenght (cm), Mean (SD) |  | 48.9 (3.1) | 50.8 (2.1) | 51.0 (1.5) | 0.688 | 46.9(2.7) | 47.1 (3.0) | 0.820 |
| Head circumference (cm), Mean (SD) |  | 33.8 (2.0) | 34.5 (1.87) | 35.6 (0.9) | 0.521 | 33.2 (1.8) | 32.6 (2.3) | 0.194 |
| APGAR score 1st minute,  Median (IQR 25-75) |  | 9 (8-9) | 9 (9-9) | 9 (8-9) | 0.279 | 8 (7-9) | 9 (7-9) | 0.483 |
| APGAR score 5th minute,  Median (IQR 25-75) |  | 10 (9-10) | 10 (9.2-10) | 10 (9-10) | 0.342 | 9 (8-9.75) | 10 (8-10) | 0.343 |
| Mode of delivery, n (%) | Cesarian | 49 (64.5) | 13(65) | 7 (41.2) | 0.147 | 15(75) | 14 (73.7) | 0.606 |
| **Maternal characteristics** |  |  |  |  |  |  |  |  |
| Maternal age (years), Mean (SD) |  | 28.7 (6.3) | 29 (6.3) | 28.8(5.6) | 0.879 | 29.6 (7.6) | 27.3 (5.9) | 0.390 |
| Number of pregnancies, n (%) | Nullipar | 23 (%30.3) | 7 (%35) | 3 (%17.6) | 0.288 | 5 (%25) | 8 (%42.1) | 0.257 |
| Gestational Diabetes, n (%) |  | 5 (%6.6) | 2 (%10) | 3 (%17.6) | 0.644 | 0 (%0) | 0 (%0) | - |
| Gestational Hypertension. n (%) |  | 10 (%13.2) | 0 (%0) | 2 (%11.8) | 0.204 | 2 (%10) | 6 (%31.6) | 0.101 |
| **Laboratuvar findings** |  |  |  |  |  |  |  |  |
| C-Reactive Protein (mg/L), Median (25-75) |  | 0.3(0.3-0.95) | 0.65(0.3-1.6) | 0.3( 0.3-1.8) | 0.209 | 0.4(0.3-1.0) | 0.3(0.3-0.3) | 0.025 |
| White Blood Cell (103uL), Mean (SD) |  | 13.9 (5.5) | 13.6(5.2) | 17.7(6.0) | 0.017 | 11.5(4.1) | 13.2(5.3) | 0.286 |
| Hemoglobin (g/dL), Mean (SD) |  | 18.6 (2.1) | 18.8(2.1) | 18.7(2.4) | 0.760 | 19.0(2.1) | 18.0(1.7) | 0.177 |
| Initial Total Bilirubin (mg/dL), Mean (SD) |  | 9.3(6.6) | 17(3.0) | 3.9 (2.1) | <0.001 | 12.8(3.3) | 2.4 (0.8) | <0.001 |
| Total Bilirubin at discharge (mg/dL), Mean (SD) |  | 7.9 (3.6) | 11.3 (2.3) | 5.3 (3.6) | 0.001 | 7.7 (3.1) | 7.0 (3.0) | 0.423 |
| **Clinical characteristics** |  |  |  |  |  |  |  |  |
| Hospital stay, (day), Mean (SD) |  | 7.3 (6.4) | 4.25 (2.0) | 5.5 (4.7) | 0.01 | 9.4 (8.0) | 10.2 (7.1) | 0.043 |
| Total phototherapy duration (round), Mean (SD) |  | 3.8 (1.3) | 4.9 (1.3) | - | - | 3.6 (1.4) | - | - |
| **Oxidative status and DNA damage** |  |  |  |  |  |  |  |  |
| TAC pg/mL, Mean (SD) |  | 27.8 (20.6) | 33.1 (27.7) | 27.1 (22.7) | 0.144 | 25.5 (15.6) | 25.1 (14.4) | 0.653 |
| TOS U/ml, Mean (SD) |  | 25.0 (18.3) | 31.4 (20.8) | 24.9 (17.4) | 0.067 | 18.8 (15.5) | 24.9 (18.3) | 0.833 |
| 8-OhdG, Mean (SD) |  | 27.3 (21.4) | 35.1 (30.2) | 23.7 (22.0) | 0.004 | 23.4 (14.3) | 26.5 (14.2) | 0.201 |

**Table 1**:Baseline demographic, maternal, laboratory, and clinical characteristics of term and preterm neonates with and without phototherapy.

Data are presented as mean ± standard deviation for normally distributed variables, median (interquartile range) for non-normally distributed variables, and number (percentage) for categorical variables. p values represent comparisons between term study and term control groups, whereas p** values represent comparisons between preterm study and preterm control groups.*

* Between the term study group and the term control group

**Between the preterm study group and the preterm control group
