# Supplementary material for: Effect of Blue LED Phototherapy on Oxidative Stress and DNA Damage in Term and Preterm Infants with Hyperbilirubinemia
Source: Research Square preprint supplement (doi:10.21203/rs.3.rs-8767914/v1), 2026-02-16
Supplement: Supplementary file 2 [file 3a3cbee1b63064cc685bf2c6.docx]

|  | TAC Before | TAC After | p* | TOS  Before | TOS  After | p* | 8-OhdG  Before | 8-OhdG  After | p* |
| --- | --- | --- | --- | --- | --- | --- | --- | --- | --- |
| Term study group (n=20) | 33.1 (27.7) | 34.4 (29.2) | 0.332 | 31.4(20.8) | 27.8 (17.7) | 0.135 | 35.1 (30.2) | 34.5 (27.1) | 0.852 |
| Preterm study group (n=20) | 25.5 (15.6) | 22.3 (15.6) | 0.008 | 18.8 (15.5) | 14.9 (11.9) | 0.002 | 23.4 (14.3) | 20.1 (13.0) | 0.002 |
| p** | 0.304 | 0.007 |  | 0.03 | 0.002 |  | 0.008 | <0.001 |  |

**Table 2:** Comparison of total antioxidant capacity (TAC), total oxidative status (TOS), and 8-hydroxy-2′-deoxyguanosine (8-OHdG) levels before and after phototherapy in term and preterm neonates

. Data are presented as mean ± standard deviation. p values indicate within-group comparisons before and after phototherapy, while p** values indicate between-group comparisons of term and preterm infants.*

*Comparison between term and preterm groups

**Comparison of term and preterm groups before and after phototherapy
